# Supplementary material for: Effects of nitrogen doses on stomatal characteristics, chlorophyll content, and agronomic traits in wheat (Triticum aestivum L.)
Source: PeerJ. 2024 Dec 24;12:e18792. doi: 10.7717/peerj.18792 (PMC11674246; doi:10.7717/peerj.18792)
Supplement: Supplemental Information 1 [file peerj-12-18792-s001.xlsx]

## Sheet: Sayfa1
YEAR	REPEAT	CULTİVAR	APPLY	Flag Leaf area	Lower intake stomatal width	Lower intake stomatal length	Upper intake stomatal width	Upper intake stomatal length	Epidermal cell number	Stomatal density	Stomatal index	Virgo height	Number of spikes	Number of spikelets in a spike	Number of grains per spike	1000 grains.	Yield	Plant height	Handle weight	Chlorophyll
1	1	V1	N1	20.16	26.74	56.56	28.24	55.06	605	148	24	7.6	260	15	33	38.12	314.767	70.93	755	19.4533
1	2	V1	N1	21.05	29.62	58.59	31.12	57.09	604	149	23	7	278	14	32	39.02	313.995	70.83	826	18.8767
1	3	V1	N1	20.2	28.52	57.99	30.02	56.49	603	147	22	7.1	264	14	33	38.48	392.024	75.1	796	12.91
1	1	V1	N2	22.12	31.77	59.12	33.27	57.62	622	152	32	8	307	16	44	41.81	453	88.63	1205	23.15
1	2	V1	N2	21.19	33.14	60.52	34.64	59.02	625	153	31	8.5	216	18	42	42.12	419	80.23	1156	22.4533
1	3	V1	N2	21.98	34.57	61.23	36.07	59.73	629	149	32	8	346	17	44	41.02	475	88.2	1248	19.3367
1	1	V1	N3	22.79	35.36	60.12	36.86	58.62	638	165	41	9.5	390	20	53	43.12	501	88.26	1540	26.6367
1	2	V1	N3	23.12	33.54	61.12	35.04	59.62	641	166	42	9.3	378	21	52	42.15	498	84.73	1459	25.8033
1	3	V1	N3	23.03	37.27	62.23	38.77	60.73	631	164	40	9	405	19	52	44.01	502	84.3	1526	24.1133
1	1	V2	N1	21.15	29.83	53.4	31.33	51.9	525	135	19	7.5	260	13	32	36.12	386.487	71.76	1070	16.29
1	2	V2	N1	22.03	32.46	56.93	33.96	55.43	521	133	17	6.7	275	10	32	36.59	331.15	65.56	1125	15.7167
1	3	V2	N1	23.1	27.27	54.62	28.77	53.12	518	134	20	6.2	253	11	31	36.14	357.034	70.73	1059	12.1467
1	1	V2	N2	22.15	34.71	58.46	36.21	56.96	625	158	33	7.5	286	13	43	37	454.569	77.06	1150	24.6967
1	2	V2	N2	23.54	32.99	57.49	34.49	55.99	615	159	32	7.5	316	11	42	37.69	429.826	81.2	1159	19.58
1	3	V2	N2	23.15	37.3	58.58	38.8	57.08	630	157	34	7	292	12	43	37.89	443.869	63.53	1054	18.9233
1	1	V2	N3	26.28	37.55	56.74	39.05	55.24	633	162	40	8.2	380	14	52	38.15	583.532	91.25	1440	27.4367
1	2	V2	N3	24.25	36.27	59.12	37.77	57.62	630	161	41	9	366	15	52	38.49	602.397	103.36	1356	26.7367
1	3	V2	N3	24.04	34.27	65.48	35.77	63.98	629	160	39	9.5	395	14	53	38.16	599.281	82.31	1500	25.23
1	1	V3	N1	23.56	32.59	51.1	34.09	49.6	526	132	18	6	264	12	32	35.15	372.857	58.26	815	28.3
1	2	V3	N1	21.21	32.29	52.52	33.79	51.02	515	133	21	7	289	14	32	35.56	377.237	71.76	798	27.05
1	3	V3	N1	21.46	32.1	49.07	33.6	47.57	528	130	19	7	256	13	32	35.44	365.006	81.1	826	23.0933
1	1	V3	N2	24.12	34.5	52.69	36	51.19	589	142	22	9	298	15	37	36.46	455.613	71.8	1160	34.7667
1	2	V3	N2	23.89	33.74	56.05	35.24	54.55	578	140	20	8	306	16	42	36.78	508.591	75.46	1266	30.7633
1	3	V3	N2	22.89	36.12	55.46	37.62	53.96	591	144	22	8	318	16	42	36.89	515.54	80.36	988	27.41
1	1	V3	N3	24.12	37.12	59.12	38.62	57.62	612	155	34	8.5	330	17	58	38.12	568	96.23	1365	40.31
1	2	V3	N3	23.89	37.65	55.46	39.15	53.96	612	156	35	9.5	349	20	54	38.96	612	83.12	1389	37.53
1	3	V3	N3	24.56	38.38	59.59	39.88	58.09	620	152	33	10.2	385	18	52	38.15	622	89.56	1233	28.3533
1	1	V4	N1	32.45	25.15	50.56	26.65	49.06	489	122	17	8.7	216	12	31	38.19	322.633	69.23	900	28.5167
1	2	V4	N1	33.01	20.71	54.56	22.21	53.06	501	124	16	9.3	222	13	32	38.46	327.749	73.03	826	23.1733
1	3	V4	N1	32.15	22.47	52.52	23.97	51.02	499	126	18	9.1	280	12	32	41.12	338.021	82.93	888	20.7133
1	1	V4	N2	35.25	31.21	53.88	32.71	52.38	512	130	18	10.2	330	15	43	42.16	429.252	95.3	840	30.5433
1	2	V4	N2	33.63	32.23	57.45	33.73	55.95	509	131	17	10	326	19	42	43.16	458.542	86.66	912	29.9867
1	3	V4	N2	33.06	30.04	59.56	31.54	58.06	521	129	17	11	351	18	42	45.12	490.664	82.23	899	27.8933
1	1	V4	N3	40.15	35.13	55.48	36.63	53.98	533	145	24	12.5	398	21	31	46.15	501.06	99.76	1735	36.1433
1	2	V4	N3	40.16	38.12	62.13	39.62	60.63	528	144	25	10.5	412	21	53	45.15	533	95.5	1736	34.1367
1	3	V4	N3	46.14	35.46	62.25	36.96	60.75	531	146	21	10.5	363	18	51	44.12	601	91.15	1699	32.9733
1	1	V5	N1	29.82	24.33	53.33	25.83	61.83	589	149	25	7.5	330	10	53	38.46	392	73.13	1245	27.2667
1	2	V5	N1	30.81	27.71	53.16	29.21	51.66	601	150	24	7.1	349	11	32	37.89	392.863	75.36	1342	26.35
1	3	V5	N1	30.21	29.07	56.51	30.57	55.01	594	151	24	7	368	12	33	38.1	315	86.1	1301	22.5267
1	1	V5	N2	32.45	31.4	54.12	32.9	52.62	612	154	28	8.5	330	13	43	39.15	484.853	86.16	1260	29.4467
1	2	V5	N2	31.89	35.01	62.26	36.51	60.76	601	155	29	8.1	299	11	42	39.56	431.057	92	1136	28.15
1	3	V5	N2	32.32	25.62	60.12	27.12	58.62	623	154	28	8	388	12	43	39.87	493.76	100.46	1245	25.1167
1	1	V5	N3	33.45	37.32	56.56	38.82	55.06	625	162	32	9	350	19	53	40.46	512	107.56	1350	34.1033
1	2	V5	N3	33.78	39.6	63.12	41.1	61.62	631	160	30	10	389	20	43	40.23	499	105.23	1401	31.5333
1	3	V5	N3	34.01	35.51	64.12	37.01	62.62	628	163	31	9.5	379	18	42	41.12	523	113.33	1356	27.5767
1	1	V6	N1	24.89	22.1	49.86	23.6	48.36	425	128	16	6.6	290	13	33	41.13	419.446	61.95	920	24.59
1	2	V6	N1	25.14	24.67	51.12	26.17	49.62	452	129	17	7.3	202	10	32	41.16	348.054	70.26	1021	22.92
1	3	V6	N1	25.45	22.6	50.12	24.1	48.62	440	130	18	7.8	308	12	32	41.12	405.745	70.3	989	19.1467
1	1	V6	N2	26.26	26.33	50.38	27.83	48.88	512	139	21	8	290	15	42	42.16	512.317	69.43	1100	25.6333
1	2	V6	N2	26.01	26.32	55.89	27.82	54.39	509	139	20	7.5	355	16	42	42.45	570.778	75.9	984	24.11
1	3	V6	N2	26.56	34.44	56.58	35.94	55.08	520	140	21	10	442	17	42	42.63	522	80.96	992	22.8
1	1	V6	N3	27.2	36	55.06	37.5	53.56	548	143	26	8.5	430	21	52	43.12	612	90.9	1585	27.43
1	2	V6	N3	28.15	38.39	57.76	39.89	56.26	551	144	25	10.6	465	20	53	43.89	600	81.1	1625	25.3133
1	3	V6	N3	25.86	40.34	59.39	41.84	57.89	546	145	26	11.5	435	22	52	43.16	545	89.53	1599	24.3433
1	1	V7	N1	32.23	31.97	50.57	33.47	49.07	546	140	22	7	255	13	32	38.44	392.529	64.8	816	28.38
1	2	V7	N1	32.09	32.56	50.05	34.06	48.55	552	139	21	6	279	14	32	37.47	374.423	69.33	825	26.5133
1	3	V7	N1	31.99	32.84	47.97	34.34	46.47	540	141	22	8.5	274	13	32	38.12	397.814	80.03	796	25.6167
1	1	V7	N2	33.76	36.13	54.03	37.63	52.53	589	154	28	8.5	330	16	36	40.12	497.634	92.96	1250	36.6833
1	2	V7	N2	35.62	37.1	54.71	38.6	53.21	591	155	27	8	266	18	43	41.16	423	89.45	1125	35.61
1	3	V7	N2	32.79	35.1	58.13	36.6	56.63	599	156	28	8	351	18	42	39.85	412	87.33	1148	31.57
1	1	V7	N3	34.44	39.15	61.23	40.65	59.73	612	163	33	9.3	378	21	57	43.16	523	101.23	1330	42.0867
1	2	V7	N3	34.76	39.9	60.23	41.4	58.73	604	163	32	9.6	392	22	51	44.12	545	86.12	1585	38.0967
1	3	V7	N3	36.8	38.78	61.42	40.28	59.92	621	162	33	8	381	21	52	42.12	512	92.83	1469	34.2267
1	1	V8	N1	24.19	32.53	57.56	34.03	56.06	612	160	30	6.5	245	16	34	43.12	401.567	66.7	1125	27.8267
1	2	V8	N1	24.97	31.53	62.23	33.03	60.73	609	159	29	6.4	276	14	30	42.12	377.477	67.36	984	26.3467
1	3	V8	N1	23.6	30.58	60.45	32.08	58.95	621	161	31	8.4	255	14	32	44.54	406.481	76.6	1164	22.41
1	1	V8	N2	35.64	32.06	61.61	33.56	60.11	648	172	36	8.7	282	17	42	45.13	426	76.16	1245	31.6767
1	2	V8	N2	33.49	32.11	60.56	33.61	59.06	654	175	35	9.6	269	18	42	46.12	488	83.8	1267	30.3033
1	3	V8	N2	34.34	33.16	63.23	34.66	61.73	641	172	36	9	249	19	41	47.12	463	94.16	1164	27.1167
1	1	V8	N3	40.48	36.36	66.12	37.86	64.62	699	182	39	8	306	23	52	47.85	525	112.76	1025	33.5267
1	2	V8	N3	40.78	34.34	60.15	35.84	58.65	655	180	38	10	316	20	52	48.12	564	107.93	1241	32.26
1	3	V8	N3	37.38	33.94	61.12	35.44	59.62	684	183	39	9	326	19	52	49.12	516	117.3	1165	29.8733
1	1	V9	N1	20.04	31.54	51.12	33.04	49.62	521	129	16	6	215	12	31	43.46	341.053	57.26	715	29.65
1	2	V9	N1	16.68	37.45	52.52	38.95	51.02	501	130	15	8	232	14	32	43.12	372.614	78.13	698	22.32
1	3	V9	N1	19.74	30.12	49.16	31.62	47.66	532	129	17	7.4	244	10	31	41.12	344.195	92.31	721	21.67
1	1	V9	N2	21.12	33.02	56.49	34.52	54.99	544	139	19	8.8	242	15	42	42.13	485.883	90.66	845	29.7767
1	2	V9	N2	23.01	34.56	55.13	36.06	53.63	538	140	19	7	292	16	40	44.54	425	102.68	921	27.66
1	3	V9	N2	21.19	33.45	56.19	34.95	54.69	544	141	20	7.5	378	15	42	44.12	489	108.8	894	26.76
1	1	V9	N3	31.25	35.49	59.58	36.99	58.08	562	147	23	8.8	403	21	53	45.12	570	99.13	1135	41.9033
1	2	V9	N3	24.1	35.16	58.15	36.66	56.65	554	148	22	7	381	22	52	44.16	554	106.33	1241	33.78
1	3	V9	N3	25.35	36.89	59.59	38.39	58.09	561	149	23	7.5	395	19	50	45.49	573	116.46	1168	32.8333
2	1	V1	N1	19.16	27.74	55.56	29.24	54.06	612	150	26	6.6	287	16	36	39.12	358.783	81	789	20.7033
2	2	V1	N1	21.02	30.62	57.59	32.12	56.09	611	151	25	6	305	15	35	38.02	352.466	88	869	20.1267
2	3	V1	N1	20.15	29.52	56.99	31.02	55.49	610	149	24	6.1	291	15	36	39.48	410.024	93	723	14.16
2	1	V1	N2	22.12	32.77	58.12	34.27	56.62	629	154	34	7	334	17	47	40.81	471	88.26	1205	24.4
2	2	V1	N2	21.98	34.14	59.52	35.64	58.02	632	155	33	7.5	243	19	45	43.12	437	102.27	1164	23.7033
2	3	V1	N2	21.01	35.57	60.23	37.07	58.73	636	151	34	7	373	18	47	40.02	493	101	1289	20.5867
2	1	V1	N3	22.22	36.36	59.12	37.86	57.62	645	167	43	8.5	417	21	56	44.12	519	93.43	1496	27.8867
2	2	V1	N3	23.16	34.54	60.12	36.04	58.62	648	168	44	8.3	405	22	55	41.15	516	94.12	1523	27.0533
2	3	V1	N3	23.06	38.27	61.23	39.77	59.73	638	166	42	8	432	20	55	43.01	520	102.68	1579	25.3633
2	1	V2	N1	21.12	30.83	52.4	32.33	50.9	532	137	21	6.5	287	14	35	36.13	404.487	83.96	1124	17.54
2	2	V2	N1	21.21	33.46	55.93	34.96	54.43	528	135	19	5.7	302	11	35	37.02	349.15	85.85	1201	16.9667
2	3	V2	N1	22.45	28.27	53.62	29.77	52.12	525	136	22	5.2	280	12	34	36.89	375.034	92.27	1145	13.3967
2	1	V2	N2	22.03	35.71	57.46	37.21	55.96	632	160	35	6.5	313	14	46	37.89	472.569	90.63	1207	25.9467
2	2	V2	N2	22.49	33.99	56.49	35.49	54.99	622	161	34	6.5	343	12	45	38.15	447.826	92.17	1245	20.83
2	3	V2	N2	22.45	38.3	57.58	39.8	56.08	637	159	36	6	319	13	46	37.49	461.869	89.89	1168	20.1733
2	1	V2	N3	23.15	38.55	55.74	40.05	54.24	640	164	42	7.2	407	15	55	39.12	601.532	94.96	1389	28.6867		2
2	2	V2	N3	24.84	37.27	58.12	38.77	56.62	637	163	43	8	393	16	55	38.98	620.397	96.19	1468	27.9867
2	3	V2	N3	23.85	35.27	64.48	36.77	62.98	636	162	41	8.5	422	15	56	39.02	617.281	113.16	1498	26.48
2	1	V3	N1	22.89	33.59	50.1	35.09	48.6	533	134	20	5	291	11	30	36.16	390.857	97.43	891	29.55
2	2	V3	N1	21.79	33.29	51.52	34.79	50.02	522	135	23	6	316	13	30	36.46	395.237	95.94	812	28.3
2	3	V3	N1	21.43	33.1	48.07	34.6	46.57	535	132	21	6	283	12	30	36.44	383.006	96.87	864	24.3433
2	1	V3	N2	22.56	35.5	51.69	37	50.19	596	144	24	8	325	14	35	37.89	473.613	93.66	1246	36.0167
2	2	V3	N2	23.15	34.74	55.05	36.24	53.55	585	142	22	7	333	15	40	38.12	526.591	95.11	1302	32.0133
2	3	V3	N2	22.46	37.12	54.46	38.62	52.96	598	146	24	7	345	15	40	38.89	533.54	97.28	1102	28.66
2	1	V3	N3	23.45	38.12	58.12	39.62	56.62	619	157	36	7.5	357	16	56	39.15	586	100.16	1246	41.56
2	2	V3	N3	24.16	38.65	54.46	40.15	52.96	619	158	37	8.5	376	19	52	39.78	630	102.11	1304	38.78
2	3	V3	N3	24.56	39.38	58.59	40.88	57.09	627	154	35	9.2	412	17	50	39.13	640	100.27	1289	29.6033
2	1	V4	N1	32.01	26.15	49.56	27.65	48.06	496	124	19	7.7	243	11	29	39.19	340.633	79.33	986	29.7667
2	2	V4	N1	31.19	21.71	53.56	23.21	52.06	508	126	18	8.3	249	12	30	39.46	345.749	78.94	963	24.4233
2	3	V4	N1	31.98	23.47	51.52	24.97	50.02	506	128	20	8.1	307	11	30	42.12	356.021	81.27	921	21.9633
2	1	V4	N2	31.89	32.21	52.88	33.71	51.38	519	132	20	9.2	357	14	41	43.16	447.252	76.42	932	31.7933
2	2	V4	N2	34.76	33.23	56.45	34.73	54.95	516	133	19	9	353	18	40	44.16	476.542	87.84	905	31.2367
2	3	V4	N2	31.94	31.04	58.56	32.54	57.06	528	131	19	10	378	17	40	46.12	508.664	92.22	914	29.1433
2	1	V4	N3	45.41	36.13	54.48	37.63	52.98	540	147	26	11.5	425	20	29	47.15	519.06	87.88	1732	37.3933
2	2	V4	N3	36.66	39.12	61.13	40.62	59.63	535	146	27	9.5	439	20	51	46.15	551	104.98	1698	35.3867
2	3	V4	N3	42.65	36.46	61.25	37.96	59.75	538	148	23	9.5	390	17	49	45.12	619	98.52	1745	34.2233
2	1	V5	N1	29.22	25.33	62.33	26.83	60.83	596	151	27	6.5	357	11	55	39.46	410	88.44	1189	28.5167
2	2	V5	N1	34.81	28.71	52.16	30.21	50.66	608	152	26	6.1	376	12	34	38.89	410.863	106.57	1279	27.6
2	3	V5	N1	35.72	30.07	55.51	31.57	54.01	601	153	26	6	395	13	35	39.1	333	91.33	1267	23.7767
2	1	V5	N2	36.32	32.4	53.12	33.9	51.62	619	156	30	7.5	357	14	45	40.15	502.853	89.12	1198	30.6967
2	2	V5	N2	35.35	36.01	61.26	37.51	59.76	608	157	31	7.1	326	12	44	40.56	449.057	82.5	1206	29.4
2	3	V5	N2	37.01	26.62	59.12	28.12	57.62	630	156	30	7	415	13	45	40.87	511.76	86.66	1300	26.3667
2	1	V5	N3	37.37	38.32	55.56	39.82	54.06	632	164	34	8	377	20	55	41.46	530	100.15	1384	35.3533
2	2	V5	N3	36.98	40.6	62.12	42.1	60.62	638	162	32	9	416	21	45	41.23	517	99.56	1396	32.7833
2	3	V5	N3	37.06	36.51	63.12	38.01	61.62	635	165	33	8.5	406	19	44	41.12	541	99	1299	28.8267
2	1	V6	N1	25.01	23.1	48.86	24.6	47.36	432	130	18	5.6	317	14	35	42.13	437.446	84	1003	25.84
2	2	V6	N1	24.15	25.67	50.12	27.17	48.62	459	131	19	6.3	229	11	34	42.64	366.054	79	1049	24.17
2	3	V6	N1	24.98	23.6	49.12	25.1	47.62	447	132	20	6.8	335	13	34	42.23	423.745	71.72	932	20.3967
2	1	V6	N2	25.03	27.33	49.38	28.83	47.88	519	141	23	7	317	16	44	43.16	530.317	64.34	1089	26.8833
2	2	V6	N2	26.12	27.32	54.89	28.82	53.39	516	141	22	6.5	382	17	44	43.16	588.778	72	1006	25.36
2	3	V6	N2	25.25	35.44	55.58	36.94	54.08	527	142	23	9	469	18	44	43.45	540	83	1007	24.05
2	1	V6	N3	26.98	37	54.06	38.5	52.56	555	145	28	7.5	457	22	54	44.54	630	86.43	1602	28.68
2	2	V6	N3	28.3	39.39	56.76	40.89	55.26	558	146	27	9.6	492	21	55	44.12	618	89.61	1632	26.5633
2	3	V6	N3	26.43	41.34	58.39	42.84	56.89	553	147	28	10.5	462	23	54	44.03	563	102	1640	25.5933
2	1	V7	N1	29.99	32.97	49.57	34.47	48.07	553	142	24	6	282	14	35	39.44	410.529	75.23	901	29.63
2	2	V7	N1	31.01	33.56	49.05	35.06	47.55	559	141	23	5	306	15	35	36.47	392.423	81.23	894	27.7633
2	3	V7	N1	29.29	33.84	46.97	35.34	45.47	547	143	24	7.5	301	14	35	39.12	415.814	79.56	812	26.8667
2	1	V7	N2	30.94	37.13	53.03	38.63	51.53	596	156	30	7.5	357	17	39	41.12	515.634	65	1198	37.9333
2	2	V7	N2	31.47	38.1	53.71	39.6	52.21	598	157	29	7	293	19	46	42.16	441	98.33	1149	36.86
2	3	V7	N2	30.98	36.1	57.13	37.6	55.63	606	158	30	7	378	19	45	40.85	430	91.75	1204	32.82
2	1	V7	N3	43.68	40.15	60.23	41.65	58.73	619	165	35	8.3	405	22	60	44.16	541	101.56	1299	43.3367
2	2	V7	N3	43.02	40.9	59.23	42.4	57.73	611	165	34	8.6	419	23	54	44.12	563	98.56	1468	39.3467
2	3	V7	N3	39	39.78	60.42	41.28	58.92	628	164	35	7	408	22	55	43.12	530	96.45	1502	35.4767
2	1	V8	N1	25.32	33.53	56.56	35.03	55.06	619	162	32	5.5	272	15	37	42.12	419.567	79	1094	29.0767
2	2	V8	N1	23.22	32.53	61.23	34.03	59.73	616	161	31	5.4	303	13	33	41.12	395.477	89	960	27.5967
2	3	V8	N1	20.61	31.58	59.45	33.08	57.95	628	163	33	7.4	282	13	35	43.53	424.481	96	1200	23.66
2	1	V8	N2	29.85	33.06	60.61	34.56	59.11	655	174	38	7.7	309	16	45	44.13	444	86.66	1206	32.9267
2	2	V8	N2	32.16	33.11	59.56	34.61	58.06	661	177	37	8.6	296	17	45	46.13	506	85.86	1289	31.5533
2	3	V8	N2	30.84	34.16	62.23	35.66	60.73	648	174	38	8	276	18	44	46.49	481	78.25	1200	28.3667
2	1	V8	N3	39.64	37.36	65.12	38.86	63.62	706	184	41	7	333	22	55	46.15	543	82	1100	34.7767
2	2	V8	N3	38.19	35.34	59.15	36.84	57.65	662	182	40	9	343	19	55	47.46	582	106.56	1300	33.51
2	3	V8	N3	41.87	34.94	60.12	36.44	58.62	691	185	41	8	353	18	55	47.15	534	109.15	998	31.1233
2	1	V9	N1	20.17	32.54	50.12	34.04	48.62	528	131	18	5	242	11	34	44.12	359.053	74	821	30.9
2	2	V9	N1	19.76	38.45	51.52	39.95	50.02	508	132	17	7	259	13	35	42.12	390.614	82	711	23.57
2	3	V9	N1	22.34	31.12	48.16	32.62	46.66	539	131	19	6.4	271	9	34	43.12	362.195	82	800	22.92
2	1	V9	N2	29.22	34.02	55.49	35.52	53.99	551	141	21	7.8	269	14	45	45.12	503.883	81.5	901	31.0267
2	2	V9	N2	26.59	35.56	54.13	37.06	52.63	545	142	21	6	319	15	43	45.1	443	80	901	28.91
2	3	V9	N2	31.26	34.45	55.19	35.95	53.69	551	143	22	6.5	405	14	45	46.12	507	73.66	901	28.01
2	1	V9	N3	40.6	36.49	58.58	37.99	57.08	569	149	25	7.8	430	20	56	46.12	588	99.66	1200	43.1533
2	2	V9	N3	33.46	36.16	57.15	37.66	55.65	561	150	24	6	408	21	55	46.16	572	105	1249	35.03
2	3	V9	N3	37.61	37.89	58.59	39.39	57.09	568	151	25	6.5	422	18	50	47.12	591	116.12	1200	34.0833

## Sheet: Sayfa2
YEAR	REPLICATION	STAGE	CULTIVAR	APPLY	Flag Leaf Chlorophyll
1	1	1	V1	N1	18.36
1	2	1	V1	N1	19.03
1	3	1	V1	N1	20.97
1	1	2	V1	N1	21.63
1	2	2	V1	N1	16
1	3	2	V1	N1	19
1	1	3	V1	N1	14.96
1	2	3	V1	N1	13.5
1	3	3	V1	N1	10.27
1	1	1	V1	N2	24
1	2	1	V1	N2	22.85
1	3	1	V1	N2	22.6
1	1	2	V1	N2	22.33
1	2	2	V1	N2	24.16
1	3	2	V1	N2	20.87
1	1	3	V1	N2	19.13
1	2	3	V1	N2	23.16
1	3	3	V1	N2	15.72
1	1	1	V1	N3	27.93
1	2	1	V1	N3	24.42
1	3	1	V1	N3	27.56
1	1	2	V1	N3	26.3
1	2	2	V1	N3	27.96
1	3	2	V1	N3	23.15
1	1	3	V1	N3	18.66
1	2	3	V1	N3	25.26
1	3	3	V1	N3	28.42
1	1	1	V2	N1	12.3
1	2	1	V2	N1	18.77
1	3	1	V2	N1	17.8
1	1	2	V2	N1	19.13
1	2	2	V2	N1	16.6
1	3	2	V2	N1	11.42
1	1	3	V2	N1	9.96
1	2	3	V2	N1	15.43
1	3	3	V2	N1	11.05
1	1	1	V2	N2	24.06
1	2	1	V2	N2	26.13
1	3	1	V2	N2	23.9
1	1	2	V2	N2	23.33
1	2	2	V2	N2	24.25
1	3	2	V2	N2	11.16
1	1	3	V2	N2	15.9
1	2	3	V2	N2	20.9
1	3	3	V2	N2	19.97
1	1	1	V2	N3	21.96
1	2	1	V2	N3	29.22
1	3	1	V2	N3	31.13
1	1	2	V2	N3	28.76
1	2	2	V2	N3	26.4
1	3	2	V2	N3	25.05
1	1	3	V2	N3	32.13
1	2	3	V2	N3	25.76
1	3	3	V2	N3	17.8
1	1	1	V3	N1	31.6
1	2	1	V3	N1	28.37
1	3	1	V3	N1	24.93
1	1	2	V3	N1	21.9
1	2	2	V3	N1	32.2
1	3	2	V3	N1	27.05
1	1	3	V3	N1	25.53
1	2	3	V3	N1	22.5
1	3	3	V3	N1	21.25
1	1	1	V3	N2	34.4
1	2	1	V3	N2	36
1	3	1	V3	N2	33.9
1	1	2	V3	N2	30.96
1	2	2	V3	N2	27.8
1	3	2	V3	N2	33.53
1	1	3	V3	N2	27.6
1	2	3	V3	N2	25.23
1	3	3	V3	N2	29.4
1	1	1	V3	N3	35.2
1	2	1	V3	N3	41.17
1	3	1	V3	N3	44.56
1	1	2	V3	N3	33.83
1	2	2	V3	N3	39.06
1	3	2	V3	N3	39.7
1	1	3	V3	N3	32.4
1	2	3	V3	N3	23.26
1	3	3	V3	N3	29.4
1	1	1	V4	N1	29.03
1	2	1	V4	N1	21.6
1	3	1	V4	N1	34.92
1	1	2	V4	N1	27.9
1	2	2	V4	N1	21.42
1	3	2	V4	N1	20.2
1	1	3	V4	N1	22.13
1	2	3	V4	N1	23.86
1	3	3	V4	N1	16.15
1	1	1	V4	N2	32.1
1	2	1	V4	N2	30
1	3	1	V4	N2	29.53
1	1	2	V4	N2	33.86
1	2	2	V4	N2	29.3
1	3	2	V4	N2	26.8
1	1	3	V4	N2	29.2
1	2	3	V4	N2	29.03
1	3	3	V4	N2	25.45
1	1	1	V4	N3	37.63
1	2	1	V4	N3	40
1	3	1	V4	N3	30.8
1	1	2	V4	N3	33.96
1	2	2	V4	N3	33.33
1	3	2	V4	N3	35.12
1	1	3	V4	N3	35.36
1	2	3	V4	N3	36
1	3	3	V4	N3	27.56
1	1	1	V5	N1	28.63
1	2	1	V5	N1	22.97
1	3	1	V5	N1	30.2
1	1	2	V5	N1	25.9
1	2	2	V5	N1	27.73
1	3	2	V5	N1	25.42
1	1	3	V5	N1	24.24
1	2	3	V5	N1	22.22
1	3	3	V5	N1	21.12
1	1	1	V5	N2	35.06
1	2	1	V5	N2	24.35
1	3	1	V5	N2	28.93
1	1	2	V5	N2	31.23
1	2	2	V5	N2	23.9
1	3	2	V5	N2	29.32
1	1	3	V5	N2	28.25
1	2	3	V5	N2	22.86
1	3	3	V5	N2	24.24
1	1	1	V5	N3	33.26
1	2	1	V5	N3	37.85
1	3	1	V5	N3	31.2
1	1	2	V5	N3	33.23
1	2	2	V5	N3	35.5
1	3	2	V5	N3	25.87
1	1	3	V5	N3	27.53
1	2	3	V5	N3	31.43
1	3	3	V5	N3	23.77
1	1	1	V6	N1	24.73
1	2	1	V6	N1	23.92
1	3	1	V6	N1	25.12
1	1	2	V6	N1	24.56
1	2	2	V6	N1	23.33
1	3	2	V6	N1	20.87
1	1	3	V6	N1	19.66
1	2	3	V6	N1	17.53
1	3	3	V6	N1	20.25
1	1	1	V6	N2	26.96
1	2	1	V6	N2	22.82
1	3	1	V6	N2	27.12
1	1	2	V6	N2	27.06
1	2	2	V6	N2	24.6
1	3	2	V6	N2	20.67
1	1	3	V6	N2	23.23
1	2	3	V6	N2	22.8
1	3	3	V6	N2	22.37
1	1	1	V6	N3	31.56
1	2	1	V6	N3	24
1	3	1	V6	N3	26.73
1	1	2	V6	N3	31.93
1	2	2	V6	N3	22.76
1	3	2	V6	N3	21.25
1	1	3	V6	N3	30.9
1	2	3	V6	N3	18.9
1	3	3	V6	N3	23.23
1	1	1	V7	N1	24.9
1	2	1	V7	N1	25.12
1	3	1	V7	N1	35.12
1	1	2	V7	N1	22.16
1	2	2	V7	N1	31.53
1	3	2	V7	N1	25.85
1	1	3	V7	N1	28.76
1	2	3	V7	N1	25.12
1	3	3	V7	N1	22.97
1	1	1	V7	N2	35.4
1	2	1	V7	N2	34.22
1	3	1	V7	N2	40.43
1	1	2	V7	N2	29.93
1	2	2	V7	N2	42.1
1	3	2	V7	N2	34.8
1	1	3	V7	N2	33.23
1	2	3	V7	N2	31.36
1	3	3	V7	N2	30.12
1	1	1	V7	N3	43.26
1	2	1	V7	N3	43.63
1	3	1	V7	N3	39.37
1	1	2	V7	N3	38.26
1	2	2	V7	N3	37.07
1	3	2	V7	N3	38.96
1	1	3	V7	N3	30.56
1	2	3	V7	N3	38.7
1	3	3	V7	N3	33.42
1	1	1	V8	N1	24.56
1	2	1	V8	N1	29.2
1	3	1	V8	N1	29.72
1	1	2	V8	N1	29.83
1	2	2	V8	N1	25.75
1	3	2	V8	N1	23.46
1	1	3	V8	N1	26.53
1	2	3	V8	N1	15.23
1	3	3	V8	N1	25.47
1	1	1	V8	N2	37.2
1	2	1	V8	N2	31.2
1	3	1	V8	N2	26.63
1	1	2	V8	N2	30.83
1	2	2	V8	N2	30.16
1	3	2	V8	N2	29.92
1	1	3	V8	N2	27.33
1	2	3	V8	N2	28.9
1	3	3	V8	N2	25.12
1	1	1	V8	N3	37
1	2	1	V8	N3	30.65
1	3	1	V8	N3	32.93
1	1	2	V8	N3	32.06
1	2	2	V8	N3	34.2
1	3	2	V8	N3	30.52
1	1	3	V8	N3	27.7
1	2	3	V8	N3	33.8
1	3	3	V8	N3	28.12
1	1	1	V9	N1	32.03
1	2	1	V9	N1	28.6
1	3	1	V9	N1	28.32
1	1	2	V9	N1	17.03
1	2	2	V9	N1	30.07
1	3	2	V9	N1	19.86
1	1	3	V9	N1	21
1	2	3	V9	N1	23.96
1	3	3	V9	N1	20.05
1	1	1	V9	N2	27.5
1	2	1	V9	N2	31.26
1	3	1	V9	N2	30.57
1	1	2	V9	N2	26.6
1	2	2	V9	N2	27.62
1	3	2	V9	N2	28.76
1	1	3	V9	N2	31.26
1	2	3	V9	N2	30
1	3	3	V9	N2	19.02
1	1	1	V9	N3	44.33
1	2	1	V9	N3	45.13
1	3	1	V9	N3	36.25
1	1	2	V9	N3	32.06
1	2	2	V9	N3	34.25
1	3	2	V9	N3	35.03
1	1	3	V9	N3	29.33
1	2	3	V9	N3	36
1	3	3	V9	N3	33.17
2	1	1	V1	N1	19.61
2	2	1	V1	N1	20.28
2	3	1	V1	N1	22.22
2	1	2	V1	N1	22.88
2	2	2	V1	N1	17.25
2	3	2	V1	N1	20.25
2	1	3	V1	N1	16.21
2	2	3	V1	N1	14.75
2	3	3	V1	N1	11.52
2	1	1	V1	N2	25.25
2	2	1	V1	N2	24.1
2	3	1	V1	N2	23.85
2	1	2	V1	N2	23.58
2	2	2	V1	N2	25.41
2	3	2	V1	N2	22.12
2	1	3	V1	N2	20.38
2	2	3	V1	N2	24.41
2	3	3	V1	N2	16.97
2	1	1	V1	N3	29.18
2	2	1	V1	N3	25.67
2	3	1	V1	N3	28.81
2	1	2	V1	N3	27.55
2	2	2	V1	N3	29.21
2	3	2	V1	N3	24.4
2	1	3	V1	N3	19.91
2	2	3	V1	N3	26.51
2	3	3	V1	N3	29.67
2	1	1	V2	N1	13.55
2	2	1	V2	N1	20.02
2	3	1	V2	N1	19.05
2	1	2	V2	N1	20.38
2	2	2	V2	N1	17.85
2	3	2	V2	N1	12.67
2	1	3	V2	N1	11.21
2	2	3	V2	N1	16.68
2	3	3	V2	N1	12.3
2	1	1	V2	N2	25.31
2	2	1	V2	N2	27.38
2	3	1	V2	N2	25.15
2	1	2	V2	N2	24.58
2	2	2	V2	N2	25.5
2	3	2	V2	N2	12.41
2	1	3	V2	N2	17.15
2	2	3	V2	N2	22.15
2	3	3	V2	N2	21.22
2	1	1	V2	N3	23.21
2	2	1	V2	N3	30.47
2	3	1	V2	N3	32.38
2	1	2	V2	N3	30.01
2	2	2	V2	N3	27.65
2	3	2	V2	N3	26.3
2	1	3	V2	N3	33.38
2	2	3	V2	N3	27.01
2	3	3	V2	N3	19.05
2	1	1	V3	N1	32.85
2	2	1	V3	N1	29.62
2	3	1	V3	N1	26.18
2	1	2	V3	N1	23.15
2	2	2	V3	N1	33.45
2	3	2	V3	N1	28.3
2	1	3	V3	N1	26.78
2	2	3	V3	N1	23.75
2	3	3	V3	N1	22.5
2	1	1	V3	N2	35.65
2	2	1	V3	N2	37.25
2	3	1	V3	N2	35.15
2	1	2	V3	N2	32.21
2	2	2	V3	N2	29.05
2	3	2	V3	N2	34.78
2	1	3	V3	N2	28.85
2	2	3	V3	N2	26.48
2	3	3	V3	N2	30.65
2	1	1	V3	N3	36.45
2	2	1	V3	N3	42.42
2	3	1	V3	N3	45.81
2	1	2	V3	N3	35.08
2	2	2	V3	N3	40.31
2	3	2	V3	N3	40.95
2	1	3	V3	N3	33.65
2	2	3	V3	N3	24.51
2	3	3	V3	N3	30.65
2	1	1	V4	N1	30.28
2	2	1	V4	N1	22.85
2	3	1	V4	N1	36.17
2	1	2	V4	N1	29.15
2	2	2	V4	N1	22.67
2	3	2	V4	N1	21.45
2	1	3	V4	N1	23.38
2	2	3	V4	N1	25.11
2	3	3	V4	N1	17.4
2	1	1	V4	N2	33.35
2	2	1	V4	N2	31.25
2	3	1	V4	N2	30.78
2	1	2	V4	N2	35.11
2	2	2	V4	N2	30.55
2	3	2	V4	N2	28.05
2	1	3	V4	N2	30.45
2	2	3	V4	N2	30.28
2	3	3	V4	N2	26.7
2	1	1	V4	N3	38.88
2	2	1	V4	N3	41.25
2	3	1	V4	N3	32.05
2	1	2	V4	N3	35.21
2	2	2	V4	N3	34.58
2	3	2	V4	N3	36.37
2	1	3	V4	N3	36.61
2	2	3	V4	N3	37.25
2	3	3	V4	N3	28.81
2	1	1	V5	N1	29.88
2	2	1	V5	N1	24.22
2	3	1	V5	N1	31.45
2	1	2	V5	N1	27.15
2	2	2	V5	N1	28.98
2	3	2	V5	N1	26.67
2	1	3	V5	N1	25.49
2	2	3	V5	N1	23.47
2	3	3	V5	N1	22.37
2	1	1	V5	N2	36.31
2	2	1	V5	N2	25.6
2	3	1	V5	N2	30.18
2	1	2	V5	N2	32.48
2	2	2	V5	N2	25.15
2	3	2	V5	N2	30.57
2	1	3	V5	N2	29.5
2	2	3	V5	N2	24.11
2	3	3	V5	N2	25.49
2	1	1	V5	N3	34.51
2	2	1	V5	N3	39.1
2	3	1	V5	N3	32.45
2	1	2	V5	N3	34.48
2	2	2	V5	N3	36.75
2	3	2	V5	N3	27.12
2	1	3	V5	N3	28.78
2	2	3	V5	N3	32.68
2	3	3	V5	N3	25.02
2	1	1	V6	N1	25.98
2	2	1	V6	N1	25.17
2	3	1	V6	N1	26.37
2	1	2	V6	N1	25.81
2	2	2	V6	N1	24.58
2	3	2	V6	N1	22.12
2	1	3	V6	N1	20.91
2	2	3	V6	N1	18.78
2	3	3	V6	N1	21.5
2	1	1	V6	N2	28.21
2	2	1	V6	N2	24.07
2	3	1	V6	N2	28.37
2	1	2	V6	N2	28.31
2	2	2	V6	N2	25.85
2	3	2	V6	N2	21.92
2	1	3	V6	N2	24.48
2	2	3	V6	N2	24.05
2	3	3	V6	N2	23.62
2	1	1	V6	N3	32.81
2	2	1	V6	N3	25.25
2	3	1	V6	N3	27.98
2	1	2	V6	N3	33.18
2	2	2	V6	N3	24.01
2	3	2	V6	N3	22.5
2	1	3	V6	N3	32.15
2	2	3	V6	N3	20.15
2	3	3	V6	N3	24.48
2	1	1	V7	N1	26.15
2	2	1	V7	N1	26.37
2	3	1	V7	N1	36.37
2	1	2	V7	N1	23.41
2	2	2	V7	N1	32.78
2	3	2	V7	N1	27.1
2	1	3	V7	N1	30.01
2	2	3	V7	N1	26.37
2	3	3	V7	N1	24.22
2	1	1	V7	N2	36.65
2	2	1	V7	N2	35.47
2	3	1	V7	N2	41.68
2	1	2	V7	N2	31.18
2	2	2	V7	N2	43.35
2	3	2	V7	N2	36.05
2	1	3	V7	N2	34.48
2	2	3	V7	N2	32.61
2	3	3	V7	N2	31.37
2	1	1	V7	N3	44.51
2	2	1	V7	N3	44.88
2	3	1	V7	N3	40.62
2	1	2	V7	N3	39.51
2	2	2	V7	N3	38.32
2	3	2	V7	N3	40.21
2	1	3	V7	N3	31.81
2	2	3	V7	N3	39.95
2	3	3	V7	N3	34.67
2	1	1	V8	N1	25.81
2	2	1	V8	N1	30.45
2	3	1	V8	N1	30.97
2	1	2	V8	N1	31.08
2	2	2	V8	N1	27
2	3	2	V8	N1	24.71
2	1	3	V8	N1	27.78
2	2	3	V8	N1	16.48
2	3	3	V8	N1	26.72
2	1	1	V8	N2	38.45
2	2	1	V8	N2	32.45
2	3	1	V8	N2	27.88
2	1	2	V8	N2	32.08
2	2	2	V8	N2	31.41
2	3	2	V8	N2	31.17
2	1	3	V8	N2	28.58
2	2	3	V8	N2	30.15
2	3	3	V8	N2	26.37
2	1	1	V8	N3	38.25
2	2	1	V8	N3	31.9
2	3	1	V8	N3	34.18
2	1	2	V8	N3	33.31
2	2	2	V8	N3	35.45
2	3	2	V8	N3	31.77
2	1	3	V8	N3	28.95
2	2	3	V8	N3	35.05
2	3	3	V8	N3	29.37
2	1	1	V9	N1	33.28
2	2	1	V9	N1	29.85
2	3	1	V9	N1	29.57
2	1	2	V9	N1	18.28
2	2	2	V9	N1	31.32
2	3	2	V9	N1	21.11
2	1	3	V9	N1	22.25
2	2	3	V9	N1	25.21
2	3	3	V9	N1	21.3
2	1	1	V9	N2	28.75
2	2	1	V9	N2	32.51
2	3	1	V9	N2	31.82
2	1	2	V9	N2	27.85
2	2	2	V9	N2	28.87
2	3	2	V9	N2	30.01
2	1	3	V9	N2	32.51
2	2	3	V9	N2	31.25
2	3	3	V9	N2	20.27
2	1	1	V9	N3	45.58
2	2	1	V9	N3	46.38
2	3	1	V9	N3	37.5
2	1	2	V9	N3	33.31
2	2	2	V9	N3	35.5
2	3	2	V9	N3	36.28
2	1	3	V9	N3	30.58
2	2	3	V9	N3	37.25
2	3	3	V9	N3	34.42
